# Supplementary material
Source: publisher site journal article supplement (https://www.dovepress.com/article/289096)
Supplement: Supplementary file 1 [file get_supplementary_file.php]

Supplemental materials

**Figure captions**

**Figure S1 Preparation process of halofuginone hydrobromide-TPGS polymer micelles (HTPM)**

**Figure S2 Effect of HTPM on apoptosis of Eph-ev cells**

**Figure S3 Apoptosis and cell cycle change of MCF-7 cells induced by different concentrations of HTPM**

**Figure S4 Effect of HTPM on reactive oxygen species (ROS) and mitochondrial membrane potential (MMP) of MCF-7 cells**


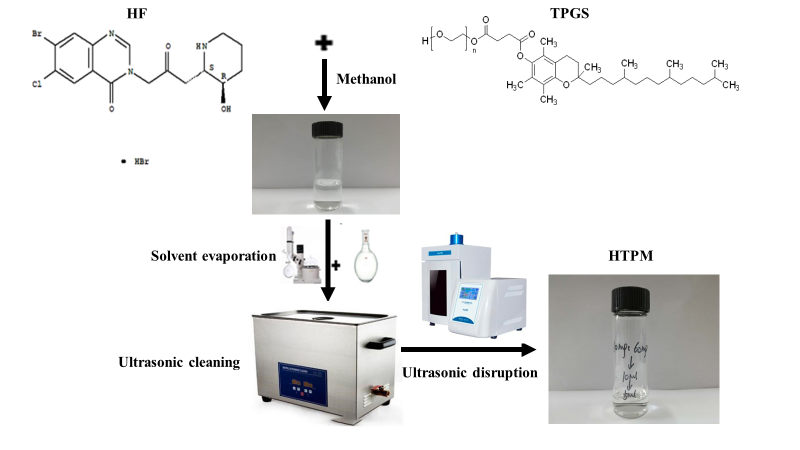


**Figure S1**


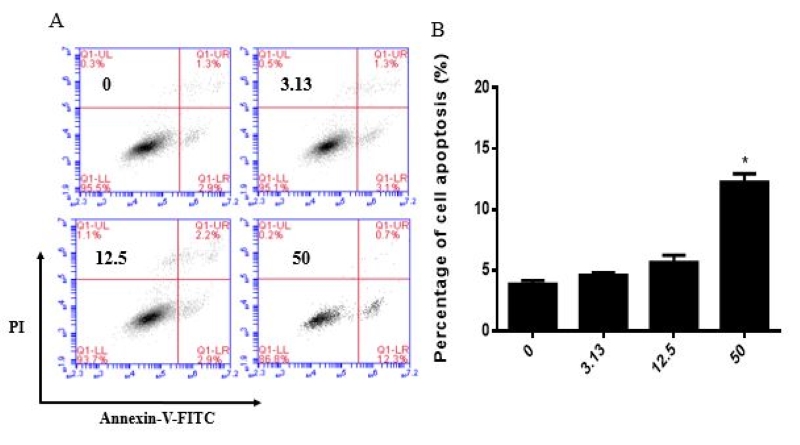


**Figure S2**


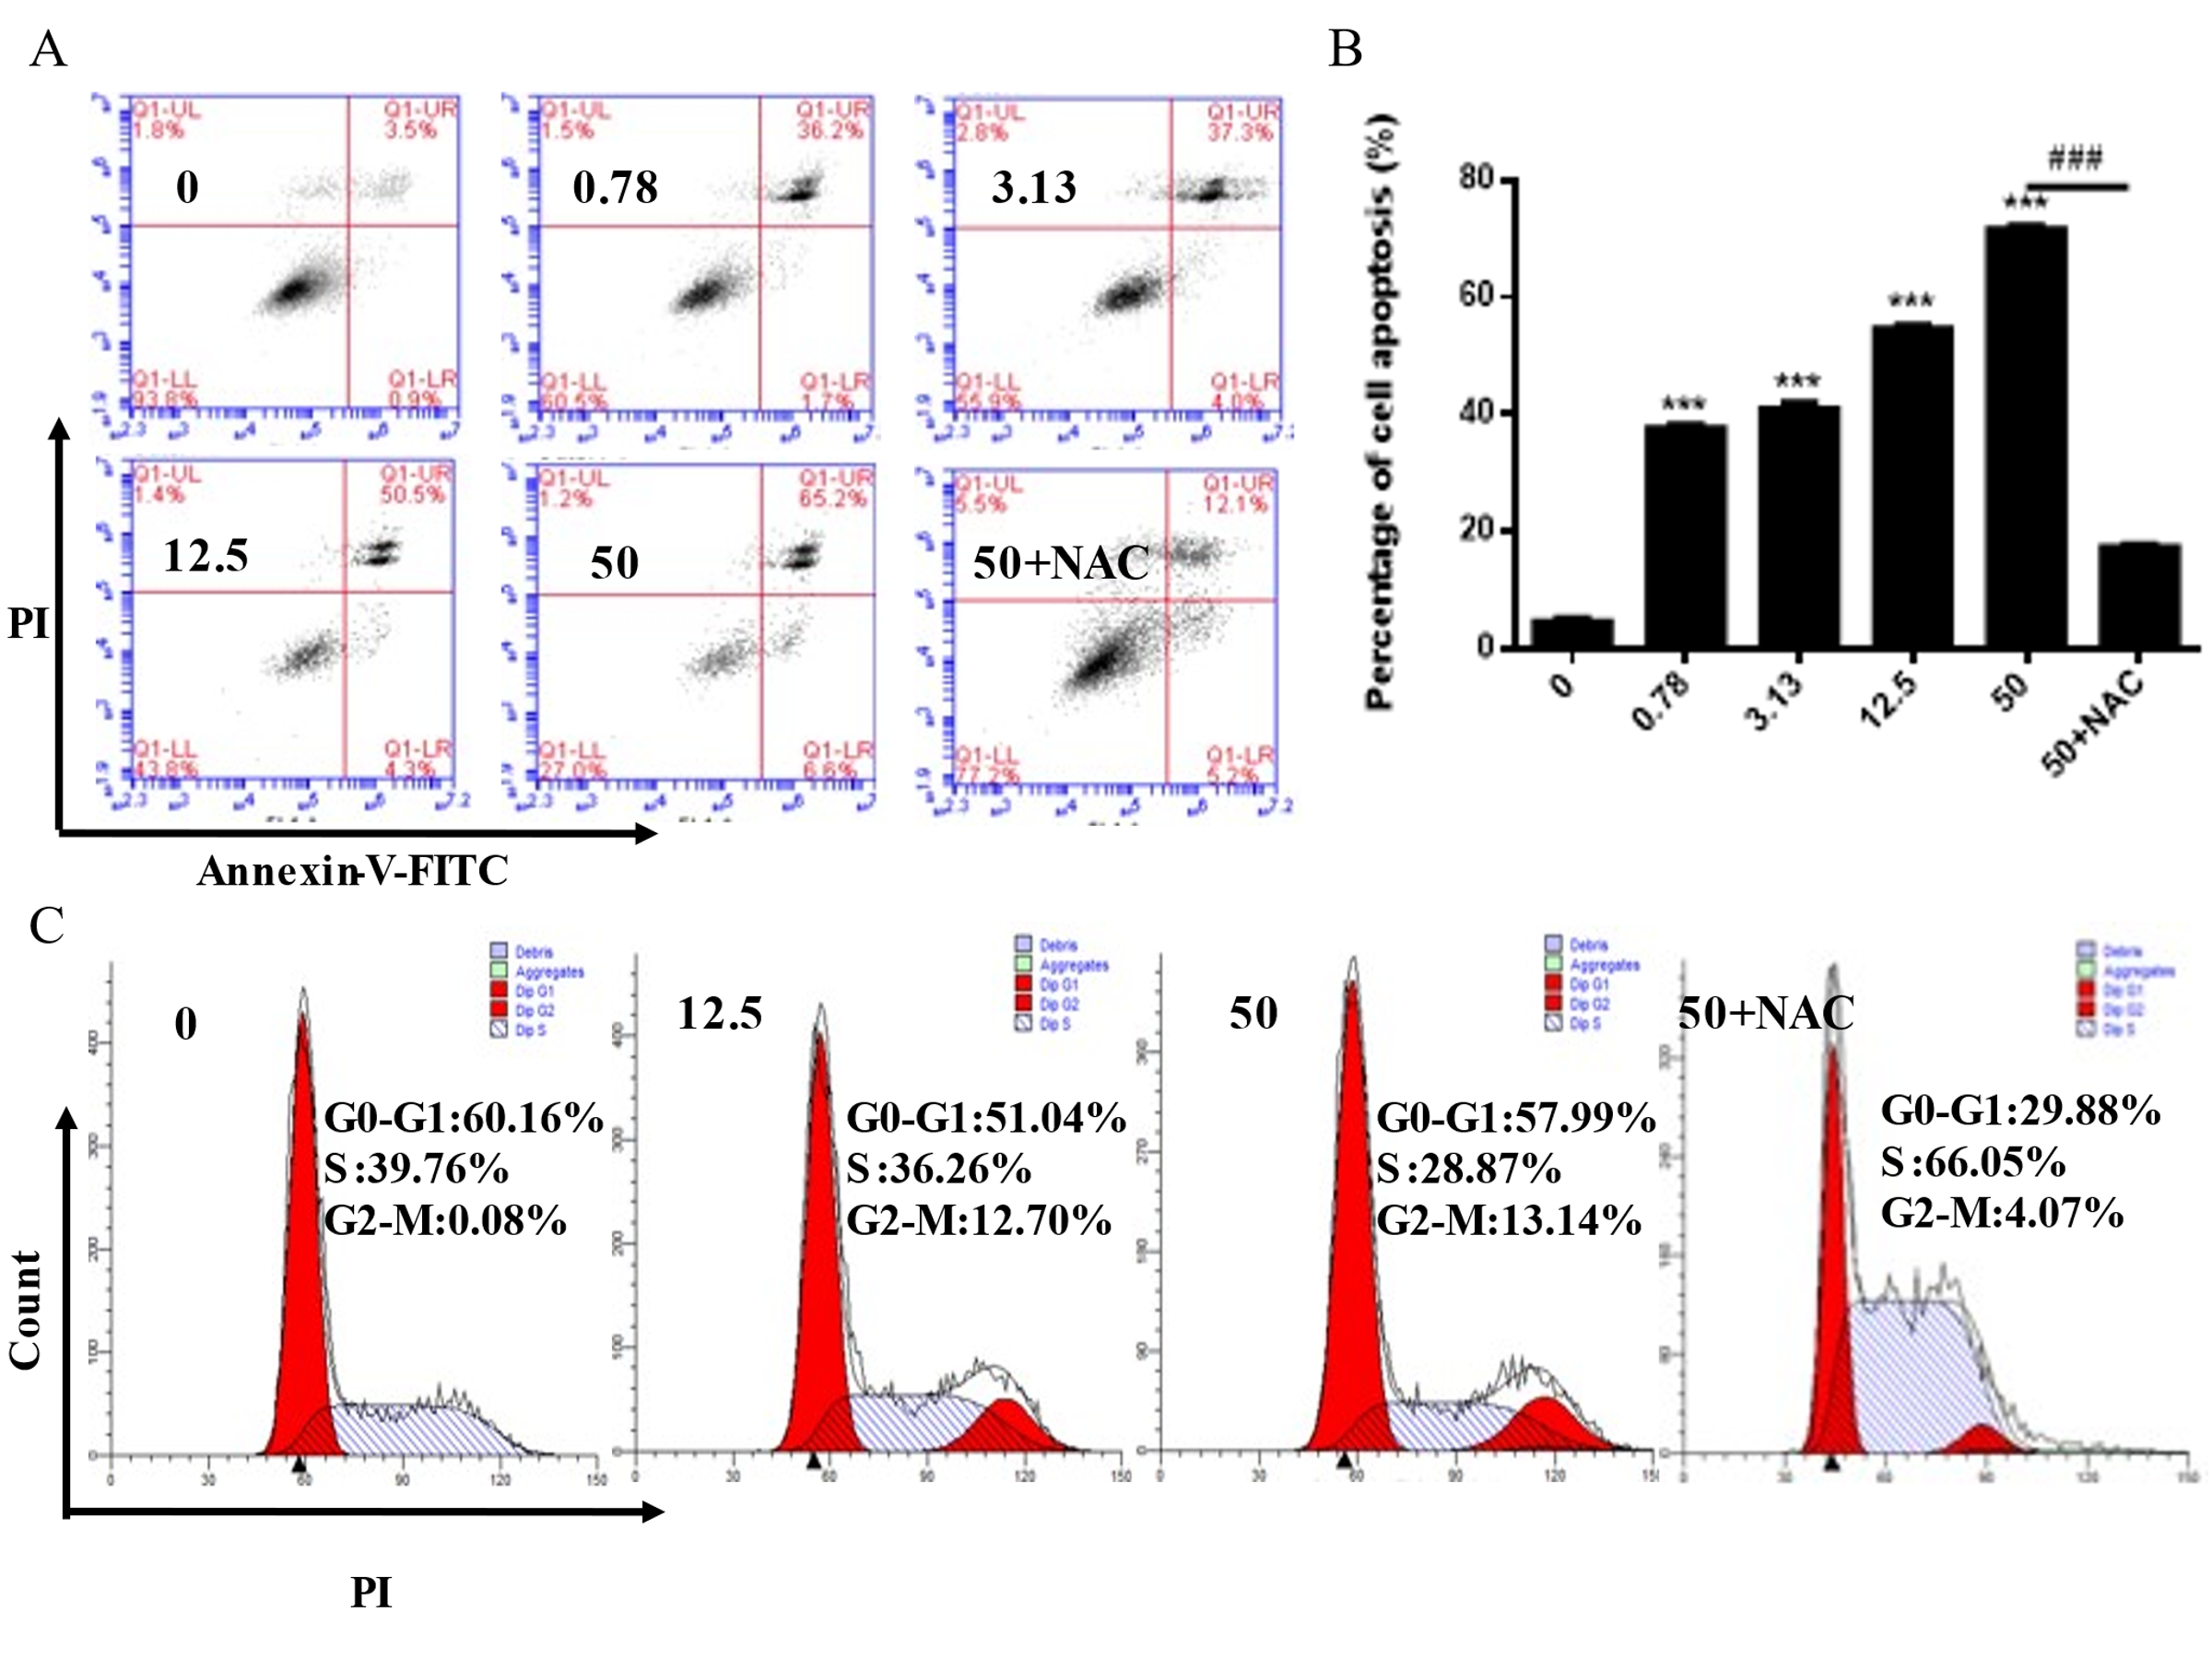


**Figure S3**


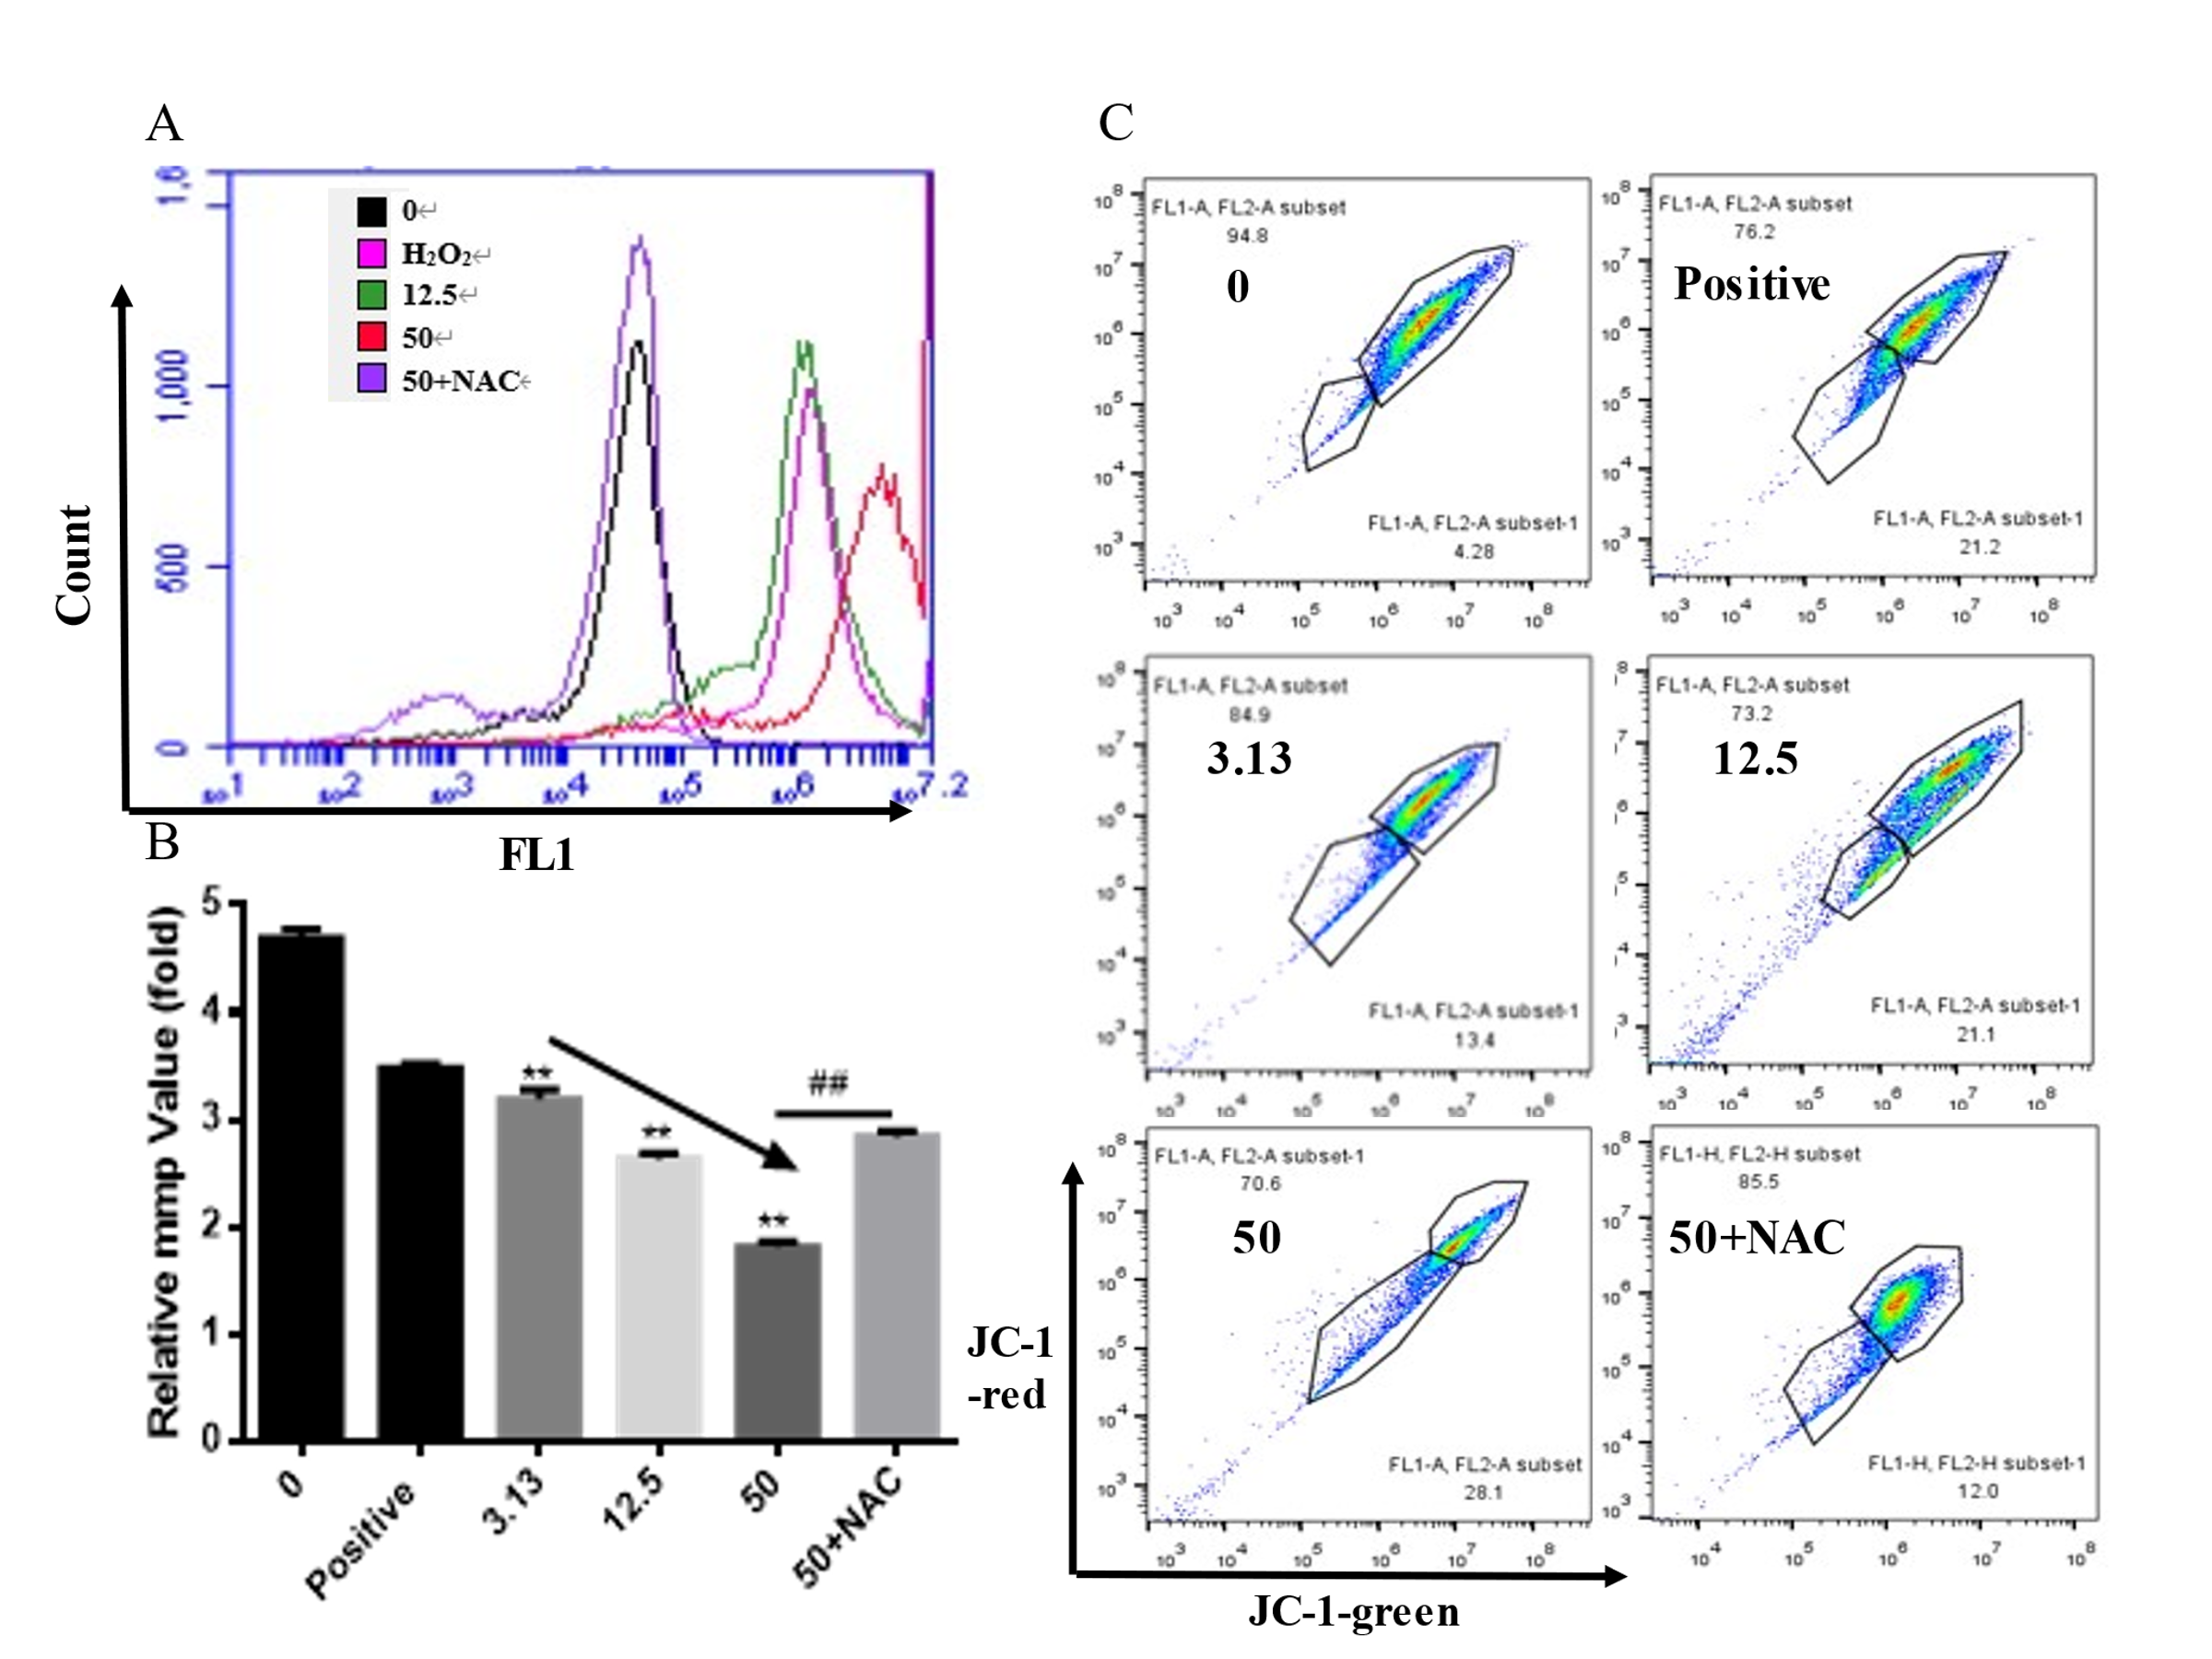


**Figure S4**
